# Supplementary material for: Investigating the effect of El Niño on nitrous oxide distribution in the Eastern Tropical South Pacific
Source: Copernicus journal article supplement (doi:10.5194/bg-2018-453), 2018-11-06
Supplement: Supplementary file [file bg-2018-453-AC2-supplement.pdf]

## Response to reviewers

### Anonymous Referee #3

[Referee] This manuscript presents the distribution and fluxes of N<sub>2</sub>O in the Eastern Tropical South Pacific region during Oct. 2015, when a strong El Niño event occurred. Measurements of N<sub>2</sub>O and other related parameters along with its isotopomers were made in the water samples collected from six stations. These measurements have been used to study the variability and biogeochemistry of N<sub>2</sub>O in the ocean water as well as the effect of this event on the distribution and fluxes of N<sub>2</sub>O in this region. The manuscript presents important results during this major El Niño event and it is very well written.

However, I have the following clarifications/suggestions for its further improvement. Specific points:

[Referee] 1. The main focus of this manuscript is on the effect of El Niño on the distribution and fluxes of N<sub>2</sub>O. The three offshore stations show buildup of N<sub>2</sub>O in the water down to 1000m depth (Fig. 8). However, the comparison for these 3 stations is limited with previous one neutral year only (2012). Also there is large variability in the 0-200m depth. Please show error bars for each point. Measurements for the three coastal stations are compared with the measurements from three different years (2011, 2009 and 1985). All these three stations show very different comparisons. Hence, it is difficult to conclude for the coastal region.

*[Response] The data availability allowed us to compare offshore water column N<sub>2</sub>O inventories during between 2015 and 2012. It is the scope of this paper to compare water column properties during El Niño vs. non-El Niño years. In coastal waters, the water column inventories were significantly higher (15 – 160% higher) during El Niño times. These apparent evidence led us to conclude that water column N<sub>2</sub>O inventories at lower latitudes during El Niño years were higher than those during non El Niño years. The analytical precision of N<sub>2</sub>O concentration measurement is < 2 nmol/L, and we will add the error bars for 2015 data on the plot. The precision of previous dataset was generally < 5%. The precision of our measurements are lower than El Niño variability and we think the conclusion of higher water column N<sub>2</sub>O inventories during El Niño will hold.*

[Referee] 2. Fig. 9 shows depth integrated N<sub>2</sub>O concentrations and comparison with earlier measurements. However, the depth taken for each station is limited by earlier measurements and it is different for different stations except for stations B and C. This, in my view, is not correct and gives a wrong comparison. The X axis scale and even the depth for the coastal stations could have been same for all the three stations for a better visualization.

*[Response] We compared the integrated N<sub>2</sub>O at the same depth range for each station; and in the revised manuscript, the depth range for offshore waters will be 0 – 800. For coastal waters, the range is shallower than 300 meters. The effects of El Niño are generally thought to be confined in the thermocline, and thus we don't expect significant changes below 1000 m at offshore waters. For coastal waters, the water depth is generally shallower than 300 m; in some cases, the entire water column was effected by El Niño. We will clarify this section in the revised draft.*

[Referee] 3. Are these earlier measurements for the same respective stations? If not, please give their locations also.

*[Response] All the location info for the data presented in Figure 9 are presented in the supplementary material Table S1. Although some measurements were not made at the exact location, data are comparable when measurements were made within 0.75 by 0.75 degree grid.*

[Referee] 4. How the observed decrease in the N<sub>2</sub>O fluxes compare with earlier studies mentioned in the introduction (P2, L17)?

*[Response] Observation from 2015 – 16 El Nino event showed 23 – 108  $\mu\text{mol}/\text{m}^2/\text{d}$ , 75 – 95 % reduction of fluxes of December 2012 (459 – 1825  $\mu\text{mol}/\text{m}^2/\text{d}$ ). This is consistent with observation from Cline et al. (1987) who reported 80% reduction in fluxes.*

[Referee] 5. P1, L25 : ‘The depth-integrated N<sub>2</sub>O....were nearly twice....’ is not correct except may be for the E and F stations. Please modify this sentence suitably and also give depth information related to integration.

*[Response] We rewrite part of the sentence as follows: “Water-column inventories of N<sub>2</sub>O within the top 1000 m were 0 – 160% higher than those measured in non-El Niño years,”*

[Referee] 6. How long this El Nino event has been there? The ONI shown in Fig. 1 for 2015 was >0.5 in January itself.

*[Response] Given the definition of El Nino event being ONI > 0.5, the event started in November 2014 and lasted until May 2016. We will include this information in the Introduction section.*

Minor corrections:

[Referee] P1, L16: ‘....was developing ..’ or developed?

*[Response] The El Nino event was still developing in Oct. 2015, as indicated by ONI in Figure 1*

[Referee] P2, L17: Please change to – ‘...related to changes in...’

*[Response] Done*
